# Supplementary material for: Inconsistent descriptions of lumbar multifidus morphology: A scoping review
Source: BMC Musculoskelet Disord. 2020 May 19;21:312. doi: 10.1186/s12891-020-03257-7 (PMC7236939; doi:10.1186/s12891-020-03257-7)
Supplement: Supplementary file 4 — Additional file 4. Studies that measured thickness of lumbar multifidus. [file 12891_2020_3257_MOESM4_ESM.docx]

**Additional file 4**

| Studies that measured thickness of lumbar multifidus, sorted by author. | | | | | | | |
| --- | --- | --- | --- | --- | --- | --- | --- |
| Author year | Method2 | Spine Level | L1 | Thickness (mm)3 | | | |
| (253) Aboufazeli 2019 | 2 | L4,L5 | D | 2.88 B,P,U,W,MM,CCC; | | 3.205 A,P,U,W,MM,CCC; | |
|  |  |  | 3.95 B,P,U,X,MM,CCC; | | 4.465 A,P,U,X,MM,CCC | |
| (317) Akbari 2008 | 2 | L4-L5 | S | 8.6 A,E,P,T,U; | 9.7 A,E,P,U; | 8.8 A,E,P,T,U; | 9.3 A,E,P,U |
| (168) Azadinia 2019 | 2 | L4 | D | 32.62 A,E,K,W,CCC,EEE; | | 33.11 A,E,K,U,W,CCC,EEE; | |
|  |  |  | 38.93 A,E,K,X,CCC,EEE; | | 39.0 A,E,K,U,X,CCC,EEE | |
| (318) Berglund 2017 | 2 | L5 | U | 27.0 B,E,T,U; | 25.8 B,E,T,V; | 24.6 A,E,T,U; | 23.5 A,E,T,V |
| (203) Brenner 2007 | 2 | L4-S1 | S | 26.5 A,E,P,W; | 28.0 A,E,P,X; | 26.5 A,E,Q,W; | 27.1 A,E,Q,X |
| (52) Cho 2013 | 2 | L4 | S | 2.4 B,K,T,V,PP; | 2.5 B,K,V,PP |  |  |
| (38) Creze 2019 | 5 | - | S | 5.20 B,PP |  |  |  |
| (96) Cuellar 2016 | 2 | L2-S1 | S | 26.0 N,W,G; | 28.3 ­N,X,G; | 24.2 O,W,G; | 26.6 O,X,G; |
| 28.5 P,W,G; | 30.2 P,X,G; | 28.4 Q,W,G; | 30.4 Q,X,G |
| (308) Cuellar 2019 | 2 | L2-S1 | - | 26.46 A,N,W, CCC,EEE | | 23.31A,O,W, CCC,EEE | |
|  |  |  | 28.64 A,P,W, CCC,EEE | | 27.44A,Q,W, CCC,EEE | |
| (211) Debuse 2013 | 2 | L4-L5 | D | 25.9 B,P,CCC | | | |
| (212) Dickx 2010 | 2 | L3-S1 | D | 31.0 B,F,O,W; | 30.7 B,G,O,W; | 34.6 B,F,P,W; | 34.5 B,G,P,W; |
| 35.4 B,F,Q,W; | 34.2 B,G,Q,W |  |  |
| (213) Djordjevic 2014 | 2 | L4-L5 | D | 27.9 A,E,P,W; | 33.9 A,E,P,X; | 28.5 B,P,W; | 37.6 B,P,X |
| (47) Djordjevic 2015 | 2 | L1-L5 | S | 27.0 E,G,W; | 28.2 E,F,W; | 34.2 E,G,X; | 35.0E,F,X; |
| 35.7 E,G,Y; | 36.8 E,F,Y |  |  |
| (309) Finta 2018 | 2 | L4,L5 | D | 24.56A,D,G,P,W,CCC | | 33.49 A,D,G,P,X,CCC | |
|  |  |  | 23.63 A,D,F,P,W,CCC | | 33.37 A,D,F,P,X,CCC | |
| (175) Fortin 2019 | 2 | L5-S1 | D / S | 29.6 G,Q,W,MM,CCC; | | 30.4 F,Q,W,MM,CCC; | |
|  |  |  | 34.4G,Q,W,MM,DDD; | | 34.6 F,Q,W,MM,DDD | |
| (108) Gibbon 2017 | 2 | L4-L5 | D | 29 B,P,W; | 35 B,P,X |  |  |
| (113) Hides 2014 | 2 | L4-L5 | S | 32.0 B,P,T | | | |
| (115) Hides 2016 | 2 | L2-L5 | S | 22.0 B,I,W; | 24.1 B,I,X; | 26.1 B,J,W; | 28.0 B,J,X; |
| 29.6 B,K,W; | 32.6 B,K,X; | 31.7 B,L,W; | 34.4 B,L,X |
| (319) Hosseinifar 2013 | 2 | L4-L5 | D | 30.0 E,G,P,T,W; | 30.8 E,F,P,T,W; | 36.28 E,G,P,T,X; | 37,06 E,F,P,T,X |
| (320) Hosseinifar 2015 | 2 | L4-S1 | D | 29.87 B,G,Q,W; | 29.23 B,F,Q,W; | 29.25 B,G,O,W; | 29,82 B,F,O,W |
| (321) Ikezoe 2012 | 2 | L4 | D | 26.7 B,K,OO; | 23.2 B,K,PP; | 22.8 B,K,PP |  |
| (335) Ikezoe 2015 | 2 | L4 | D | 26.8 B,K,MM,PP | | | |
| (322) Joseph 2015 | 2 | L4 | D | 28.0 A,K,QQ; | 29.0 A,K,RR |  |  |
| (127) Kiesel 2007 | 2 | L4-L5 | S | 24.8 B,P,W; | 32.8 B,P,X |  |  |
| (75) Kiesel 2007 | 2 | L4-S1 | D | 12.3 A,E,P,EE; | 15.4 A,E,P,FF; | 11.1 A,E,Q,EE; | 12.3 A,E,Q,OO |
| (301) Kim 2014 | 2 | L1-L2 | U | 35.9 B,M,X | | | |
| (311) Kim 2018 | 2 | L4,L5 | - | 23.29 A,E,P,T | 22.83 A,E,P,T |  |  |
| (74) Koppenhaver 2009 | 2 | L4-L5 | S | 34.6 E,P,W; | 37.9 E,P,X |  |  |
| (53) Lariviere 2013 | 2 | L2-L5 | S | 27.6 E,N,X; | 28.1 E,N,X; | 35.9 B,N,X; | 35.8 B,N,X; |
| 32.5 E,P,X; | 33.2 E,P,X; | 39.6 B,P,X; | 41.1 B,P,X |
| (131) Lariviere 2018 | 2 | L3-S1 | S | 30.0 B,G,Q; | 29.9 B,F,Q; | 28.6 B,G,P; | 28.3 B,F,P; |
| 26.8 B,G,O; | 26.6 B,F,O |  |  |
| (336) Lee 2016 | 2 | U |  | 7.8 B,T,OO; | 7.3 B,T,OO |  |  |
| (135) MacDonald 2011 | 2 | L4-S1 | D / S | 26.6 B,F,Q,X; | 26.8 B,F,Q,X; | 26.6 B,G,Q,X; | 27.1 B,G,Q,X; |
| 25.9 E,F,Q,X,; | 26.3 E,F,Q,X; | 26.6 E,G,Q,X; | 27.3 E,G,Q,X |
| (136) Masaki 2015 | 2 | L4 | D | 23.4 B,K,MM,PP | | | |
| (325) Masaki 2016 | 2 | L4 | D | 23.3 B,K,MM,PP | | | |
| (233) Nabavi 2014 | 2 | L4-L5 | S | 26.1 G,P; | 26.9 F,P |  |  |
| (235) Nuzzo 2014 | 2 | L4-L5 | S | 29.0 B,K,LL; | 28.0 B,L, LL; | 24.0 B,K,MM | 24.0 B,L,MM |
| (236) Partner 2014 | 2 | L4-L5 | D / S | 28.9 E,P,T,CCC; | 30.4 E,P,T,DDD |  |  |
| (259) Pishnamaz 2018 | 2 | L3-L5 | S | 28.2A,O.W,CCC,EEE; | | 29.1 A,O.X,CCC,EEE | |
|  |  |  |  | 26.5 B,O.W,CCC,EEE | | 27.8 B,O.X,CCC,EEE | |
|  |  |  |  | 29.9 A,P.W,CCC,EEE | | 30.8 A,P,X,CCC,EEE | |
|  |  |  |  | 28.4 B,P.W,CCC,EEE | | 29.4 B,P.X,CCC,EEE | |
| (239) Seung 2007 | 3, 4 | U | D | 39.8 B,T | | | |
| (187) Shadani 2018 | 2 | L5 | - | 28.9 B,G,L,W,CCC | | 30.3 B,F,L,W,CCC | |
|  |  |  |  | 29.1 B,G,L,X,CCC | | 31.3 B,F,L,X,CCC | |
| (51) Sions 2014 | 2 | L3-S1 | S | 29.7 B,P,W,OO; | 29.2 B,P,W,OO; | 33.6 B,P,W,PP; | 33.0 B,P,W,PP |
| (144) Sions 2015 | 2 | L4-L5 | S | 35.9 E,P,W; | 40.4E,P,X |  |  |
| (286) Skeie 2015 | 2 | U | S | 27.9 E; | 28.9 E,W; | 32.1 E,X; | 29.7 E,X; |
| 28.4 E,W; | 30.6 E,W |  |  |
| (151) Sweeney 2014 | 2 | L4-S1 | S | 29.0 A,E,P,W; | 29.9 B,E,P,W; | 29.3 A,E,Q,W; | 29.9 B,E,Q,W; |
| 34.2 A,E,P,X; | 33.7 B,E,P,X; | 32.4 A,E,Q,X; | 32.5 B,E,Q,X |
| (340) Tsuchikane 2017 | 2 | L5 | U | 27.3 B,L; | 27.9 B,L |  |  |
| (305) Wachi 2017 | 1, 2 | L5 | U | 27.3 B,G,L,LL,OO; | 26.8 G,F,L,LL,OO; | 28.2 B,G,L,LL,OO; | 27.9 G,F,L,LL,OO |
| (159) Wallwork 2009 | 2 | L2-L5 | S | 29.0 B,I,W; | 31.0 B,I,X; | 33.0 B,J,W; | 34.7 B,J,X; |
| 35.9 B,K,W; | 37.7 B,K,X; | 35.9 B,L,W; | 38.1 B,L,X; |
| 27.7 A,I,W; | 28.9 A,I.X; | 30.5 A,J,W; | 31.9 A,J,X; |
| (162) Wilson 2016 | 2 | L2-S1 | S | 28.0 B,N,W,PP; | 28.3 B,N,X,PP; | 25.4 B,O,W,PP; | 25.9 B,O,X,PP; |
| 32.6 B,P,W,PP; | 32.8 B,P,X,PP; | 29.1 B,Q,W,PP; | 30.0 B,Q,X,PP |
| (163) Worsley 2012 | 2 | L3-L4 | S | 27.3 O,EEE; | 27.2 O,FFF |  |  |
| (326) Yang 2015 | 2 | L4-L5 | U | 18.0 B,P,T; | 20.0 B,P,T |  |  |
| (263) Yoshiko 2018 | 2 | L4,L5 | - | 29.9 B,P,LL,FFF | | 24.9B,P,LL,FFF | |
| (49) Zapata 2015 | 2 | L1,L4 | S | 13.7 B,H,W; | 19.7 B,K,W; | 13.9 B,G,H,W; | 19.6 B,G,K,W; |

1 L=Location; S = Superficial; D = Deep; U = Unretrievable.
2 1 = MRI; 2 = USI; 3 = CT; 4 = Photo; 5 = Drawing; 6 = Modelling; 7 = Stereomicroscope; 8 = Tractography.
3 See Appendix 5.
